# Supplementary material
Source: PubMed Central journal article supplement (PMC2781991)

**Table S1. (A) Bacterial strains, plasmids and (B) primers utilized in this study.**

| <b>Strains</b> | <b>Relevant Genotype</b>                                                                                        | <b>Source</b>  |
|----------------|-----------------------------------------------------------------------------------------------------------------|----------------|
| SF100          | F- $\Delta lacX74$ <i>galE galK thi rpsL</i> ( <i>strA</i> ) $\Delta phoA$ ( <i>Pvull</i> ) $\Delta(ompT-entF)$ | Ref (1)        |
| MC1000         | <i>araD139</i> $\Delta(araA-leu)7679$ $\Delta(codB-lac)X74$ <i>galE15 galK16 rpsL150 relA1 thi</i>              | Lab Collection |
| BL21(DE3)pLysS | F <i>ompT hsdS<sub>B</sub>(r<sub>B</sub> m<sub>B</sub>) gal dcm</i> (DE3) pLysS (Cam <sup>R</sup> )             | Novagen        |
| PB351          | SF100 $\Delta degP$ $\Delta dsbC$                                                                               | Ref (2)        |
| PB403          | SF100 $\Delta degP$ <i>dsbA::kan</i>                                                                            | Lab Collection |
| LM106          | MC1000 <i>dsbA::kan5</i>                                                                                        | Lab Collection |
| LM102          | MC1000 <i>dsbB::kan5</i>                                                                                        | Ref (3)        |

  

| <b>Plasmids</b>               | <b>Relevant Genotype</b>                                                                                      | <b>Source</b>  |
|-------------------------------|---------------------------------------------------------------------------------------------------------------|----------------|
| pET-28(a)                     | T7 expression vector, C-terminal 6x histidine tag                                                             | Novagen        |
| pTrcStIIvtPA                  | <i>tPA</i> ( $\Delta 6-175$ ) with StII leader in pTrc99A                                                     | Ref (4)        |
| pBADdsbC                      | <i>dsbC</i> from <i>Escherichia coli</i> in pBAD33                                                            | Lab Collection |
| pBAD-mDsbC-mDsbC              | two <i>dsbC</i> genes fused via (GGGS) <sub>3</sub> GSA linker in pBAD33                                      | This work      |
| pBAD-DsbC[C98A]               | <i>dsbC</i> C98A in pBAD33                                                                                    | This work      |
| pBAD-mDsbC-mDsbC[C98A]        | <i>dsbC</i> fused to <i>dsbC</i> C98A via (GGGS) <sub>3</sub> GSA linker in pBAD33                            | This work      |
| pBAD-DsbC[C98A/C101A]         | <i>dsbC</i> C98A C101A in pBAD33                                                                              | This work      |
| pBAD-mDsbC-mDsbC[C98A/C101A]  | <i>dsbC</i> fused to <i>dsbC</i> C98A C101A via (GGGS) <sub>3</sub> GSA linker in pBAD33                      | This work      |
| pBAD-DsbC[C101A]              | <i>dsbC</i> C101A in pBAD33                                                                                   | This work      |
| pBAD-mDsbC-mDsbC[C101A]       | <i>dsbC</i> fused to <i>dsbC</i> C101A via (GGGS) <sub>3</sub> GSA linker in pBAD33                           | This work      |
| pBAD-mDsbC-dim                | <i>dsbC</i> fused to <i>dsbC</i> ( $\Delta 65-216$ ) via (GGGS) <sub>3</sub> GSA linker in pBAD33             | This work      |
| pBAD-mDsbC[H45D]-dim[D53H]    | <i>dsbC</i> H45D fused to <i>dsbC</i> D53H ( $\Delta 65-216$ ) via (GGGS) <sub>7</sub> SA linker in pBAD33    | This work      |
| pET28-DsbC                    | <i>dsbC</i> from <i>Escherichia coli</i> in pET-28(a)                                                         | Lab Collection |
| pET28-mDsbC-mDsbC             | two <i>dsbC</i> genes fused via (GGGS) <sub>3</sub> GSA linker in pET-28(a)                                   | This work      |
| pET28-DsbC[C98A]              | <i>dsbC</i> C98A in pET-28(a)                                                                                 | This work      |
| pET28-mDsbC-mDsbC[C98A]       | <i>dsbC</i> fused to <i>dsbC</i> C98A via (GGGS) <sub>3</sub> GSA linker in pET-28(a)                         | This work      |
| pET28-DsbC[C98A/C101A]        | <i>dsbC</i> C98A C101A in pET-28(a)                                                                           | This work      |
| pET28-mDsbC-mDsbC[C98A/C101A] | <i>dsbC</i> fused to <i>dsbC</i> C98A C101A via (GGGS) <sub>3</sub> GSA linker in pET-28(a)                   | This work      |
| pET28-DsbC[C101A]             | <i>dsbC</i> C101A in pET-28(a)                                                                                | This work      |
| pET28-mDsbC-mDsbC[C101A]      | <i>dsbC</i> fused to <i>dsbC</i> C101A via (GGGS) <sub>3</sub> GSA linker in pET-28(a)                        | This work      |
| pET28-mDsbC-dim               | <i>dsbC</i> fused to <i>dsbC</i> ( $\Delta 65-216$ ) via (GGGS) <sub>3</sub> GSA linker in pET-28(a)          | This work      |
| pET28-mDsbC[H45D]-dim[D53H]   | <i>dsbC</i> H45D fused to <i>dsbC</i> D53H ( $\Delta 65-216$ ) via (GGGS) <sub>7</sub> SA linker in pET-28(a) | This work      |
| pET28-mDsbC[H45D]-dim[H45D]   | <i>dsbC</i> H45D fused to <i>dsbC</i> H45D ( $\Delta 65-216$ ) via (GGGS) <sub>7</sub> SA linker in pET-28(a) | This work      |

1. Baneyx, F., and G. Georgiou 1990. *J Bacteriol* **172**, 491-494 3.
2. Bessette, P. H., Qiu, J., Bardwell, J. C., Swartz, J. R. & Georgiou, G. (2001) *J Bacteriol* **183**, 980-8.
3. Masip, L., Pan, J. L., Haldar, S., Penner-Hahn, J. E., DeLisa, M. P., Georgiou, G., Bardwell, J. C. & Collet, J. F. (2004) *Science* **303**, 1185-9.
4. Bessette, P. H., Aslund. Beckwith & Georgiou, G. (1999) *Proc. Natl. Acad. Sci. U.S.A.* **96**, 13703-13708



**Figure S1.** Expression level of the covalently linked DsbC variants as shown by western blot analysis. Overnight cultures of PB351 (SF100  $\Delta degP \Delta dsbC$ ) cells grown in LB medium supplemented with 25  $\mu\text{g/ml}$  of chloramphenicol at 37 °C were sub-cultured, grown to  $\text{OD}_{600} \sim 0.8$  and induced with arabinose (0.2% final concentration). After 2 hours of induction, samples were collected, mixed with SDS-PAGE loading buffer and boiled, an equal number of  $A_{600}$  units were then loaded on each lane. Western blot analysis was carried out using a monoclonal antipolyhistidine HRP-conjugated antibody.

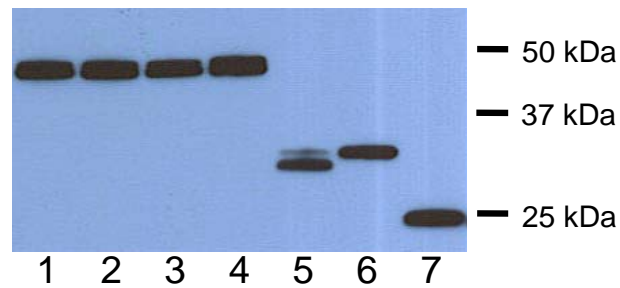

1. mDsbC-mDsbC
2. mDsbC-mDsbC[C98A]
3. mDsbC-mDsbC[C98A/C101A]
4. mDsbC-mDsbC[C101A]
5. mDsbC-dim
6. mDsbC[H45D]-dim[D53H]
7. DsbC

**Figure S2.** Gel filtration FPLC of mDsbC-dim. Purified proteins were run on a Superdex™ 200 column in PBS-10% glycerol buffer. Fractions corresponding to peaks A and B were collected and further analyzed by re-running them independently under identical conditions.

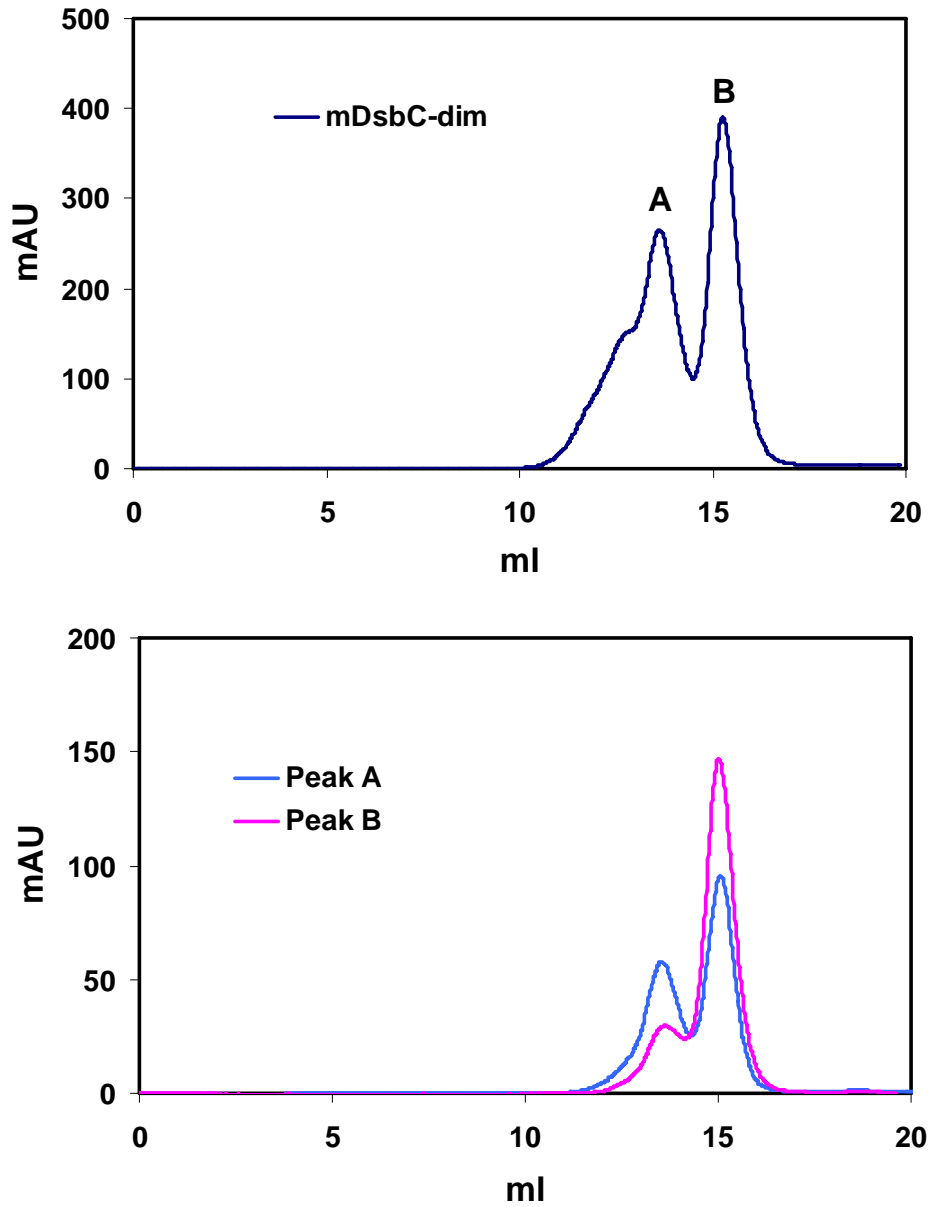

**Fig S3.** Gel filtration FPLC of mDsbC-dim derivative proteins containing 17, 19, and 30 amino-acid glycine-serine linkers.

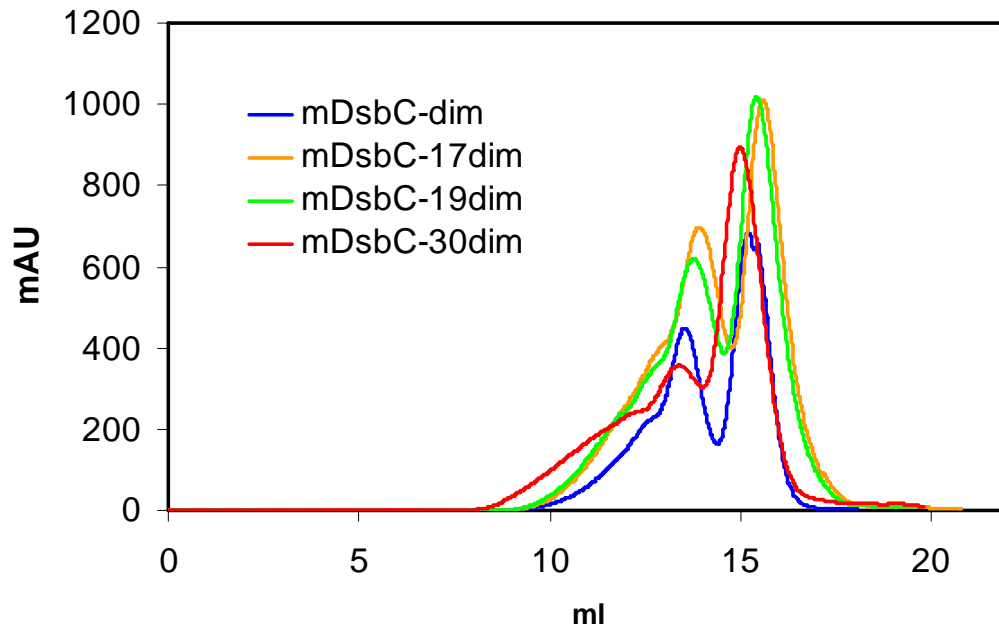

**Fig S4.** *In vivo* redox state of DsbC and covalently linked proteins. PB351 (SF100  $\Delta degP \Delta dsbC$ ) cell samples were precipitated with trichloroacetic acid (TCA). Derivatization of free thiols was performed using 15mM AMS. The reduced and oxidized standards were generated by the same procedure using 0.02 mg of purified protein. For the reduced standard, the protein was previously incubated with 100mM DTT. For the oxidized standard, addition of AMS was omitted. Following SDS-PAGE in a 12% gel, the proteins were detected by western blot using antihistidine HRP-conjugated antibody.

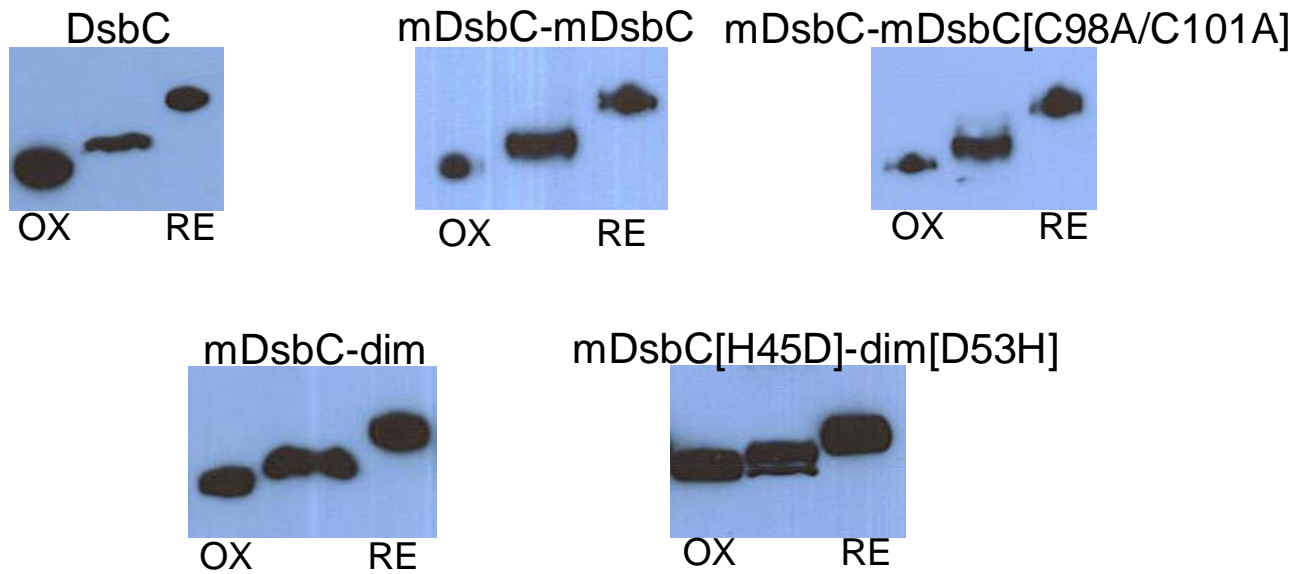

Supplement: supp_M109.010199_jbc.M109.010199-1.pdf [file supp_M109.010199_jbc.M109.010199-1.pdf]
